# Supplementary material
Source: publisher figshare collection journal article supplement (https://karger.figshare.com/ndownloader/files/24170315)
Supplement: Supplementary file 1 [file 24170315]

| **Pollutant** | **Time Period** | **Agency** | **Concentration** | **Permitted exceedances per year** |
| --- | --- | --- | --- | --- |
| PM2.5 | Yearly | EU | 25 μg/m3 | N/A |
| WHO | 10 μg/m3 | N/A |
| Daily | EU | N/A | N/A |
| WHO | 25 μg/m3 | None |
| PM10 | Yearly | EU | 40 μg/m3 | N/A |
| WHO | 20 μg/m3 | N/A |
| Daily | EU | 50 μg/m3 | 35 |
| WHO | 50 μg/m3 | None |
| NO2 | Yearly | EU | 40 μg/m3 | N/A |
| WHO | 40 μg/m3 | N/A |
| Hourly | EU | 200 μg/m3 | 18 |
| WHO | 200 μg/m3 | None |
| SO2 | Daily | EU | 125 μg/m3 | 3 |
| WHO | 20 μg/m3 | None |
| Hourly | EU | 350 μg/m3 | 24 |
| 10-minute mean | WHO | 500 μg/m3 | None |
| Ozone | Maximum daily 8 hour mean | EU | 120 μg/m3 | 25 days averaged over 3 years |
| WHO | 100 μg/m3 | None |

Supplemental Table 1: European Union and World Health Organisation limits for air pollutants (2019)


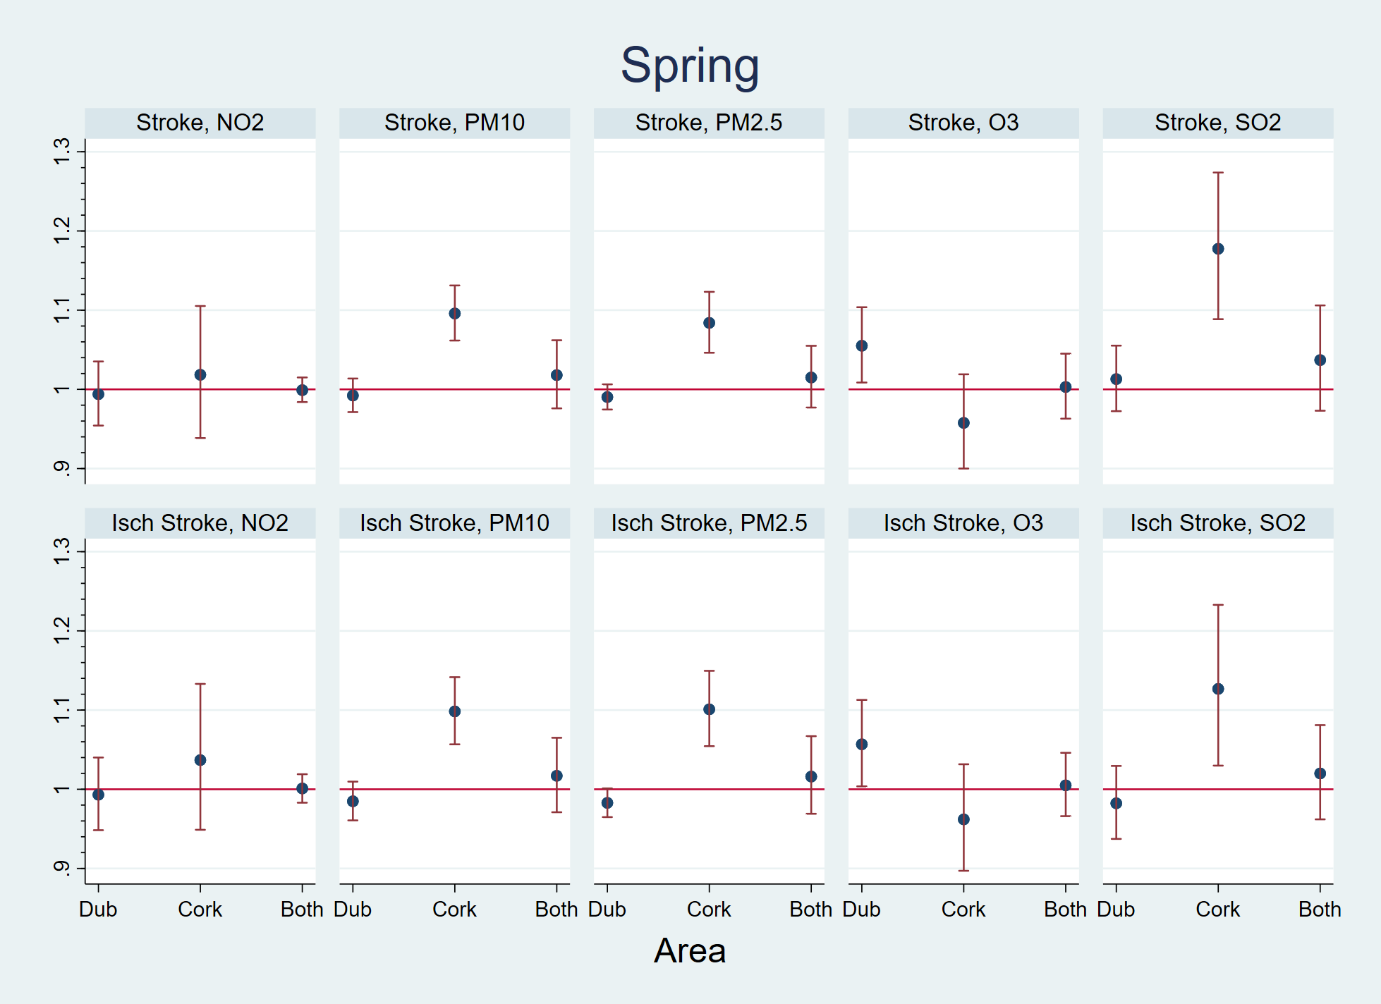


Supplemental Figure 1: Single-pollutant models for the impact of IQR changes in pollution levels for all stroke cases (Stroke) and ischaemic stroke cases (Isch Stroke) in Dublin (Dub), Cork, and both areas together at lag 0-2 days during Spring. Relative risks (blue dots) and 95% confidence intervals (red vertical lines).


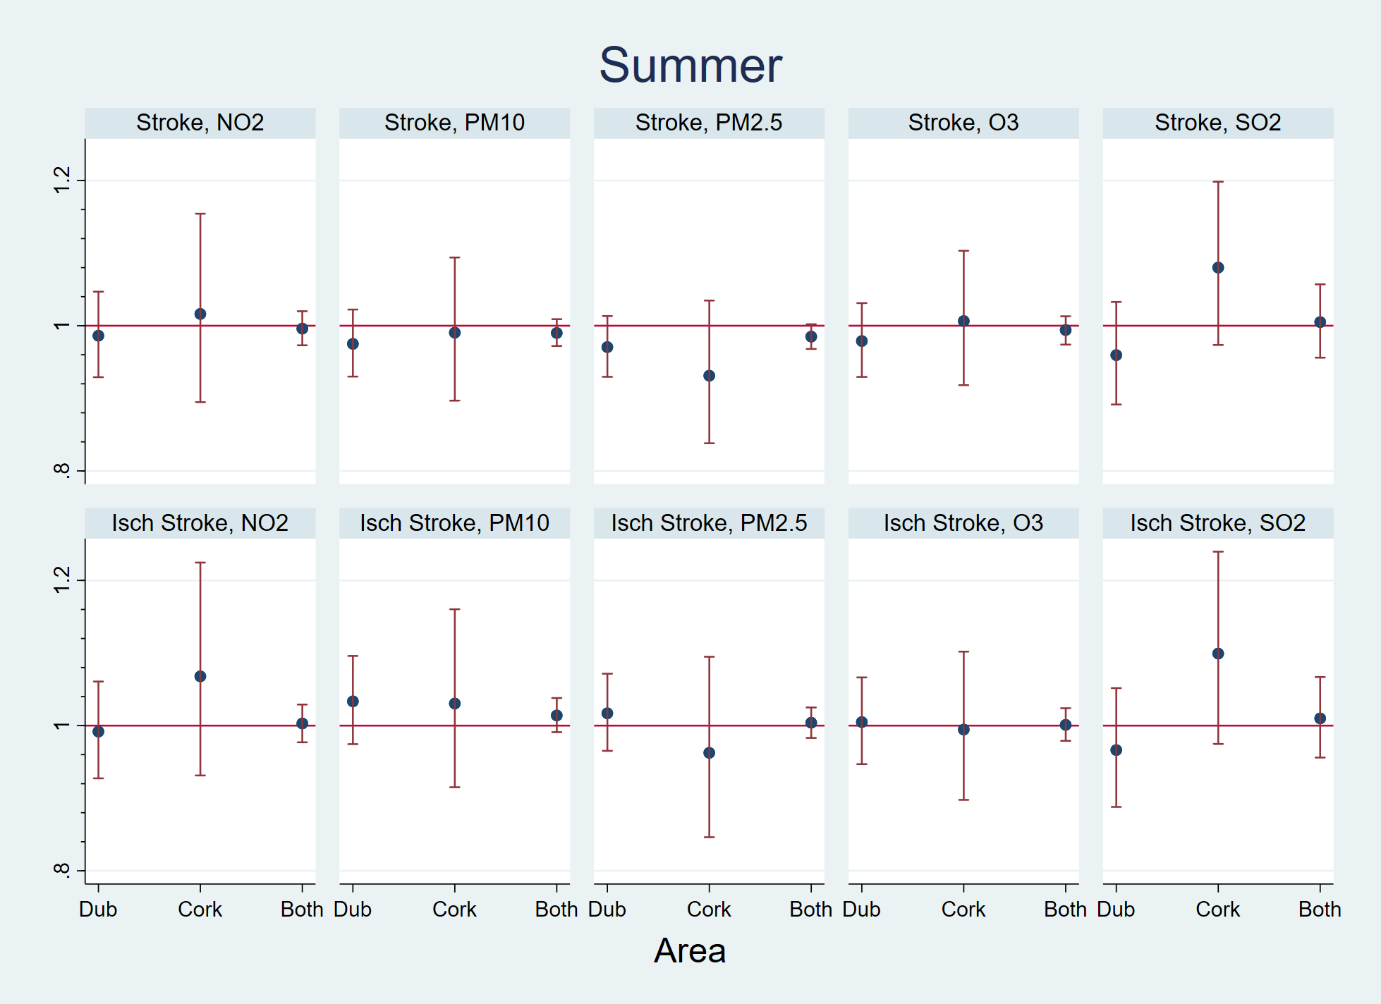


Supplemental Figure 2: Single-pollutant models for the impact of IQR changes in pollution levels for all stroke cases (Stroke) and ischaemic stroke cases (Isch Stroke) in Dublin (Dub), Cork, and both areas together at lag 0-2 days during Summer. Relative risks (blue dots) and 95% confidence intervals (red vertical lines).


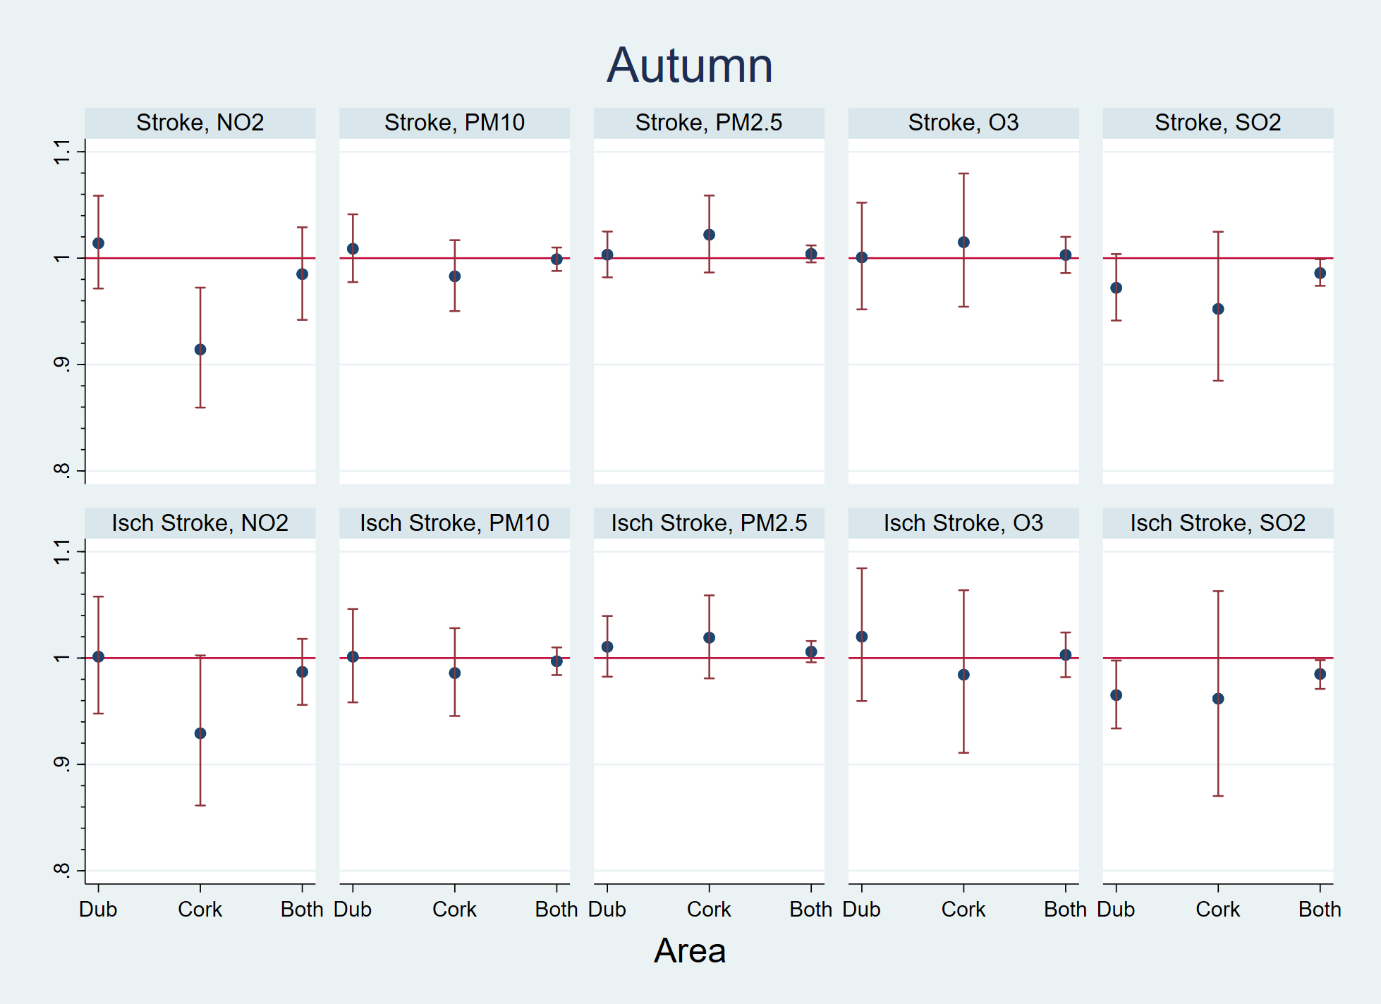


Supplemental Figure 3: Single-pollutant models for the impact of IQR changes in pollution levels for all stroke cases (Stroke) and ischaemic stroke cases (Isch Stroke) in Dublin (Dub), Cork, and both areas together at lag 0-2 days during Autumn. Relative risks (blue dots) and 95% confidence intervals (red vertical lines).
